# Supplementary material for: Heterogeneous freezing of super cooled water droplets in micrometre range-freezing on a chip
Source: Copernicus journal article supplement (doi:10.5194/acp-2017-31), 2017-01-16
Supplement: Supplementary file 1 [file acp-2017-31-supplement.zip]

Archive with 2 entries (2 files):
- Snomax_cutted.mp4
- Supplementary material.pdf
